# Supplementary material for: Deciphering the Dose-Dependent Effects of Thymoquinone on Transcriptomic Changes and Cellular Proliferation in Glioblastoma
Source: Preprints.org preprint supplement (doi:10.20944/preprints202401.1894.v1), 2024-01-26
Supplement: Supplementary file 1 [file supplementary]

**Supplementary Files**


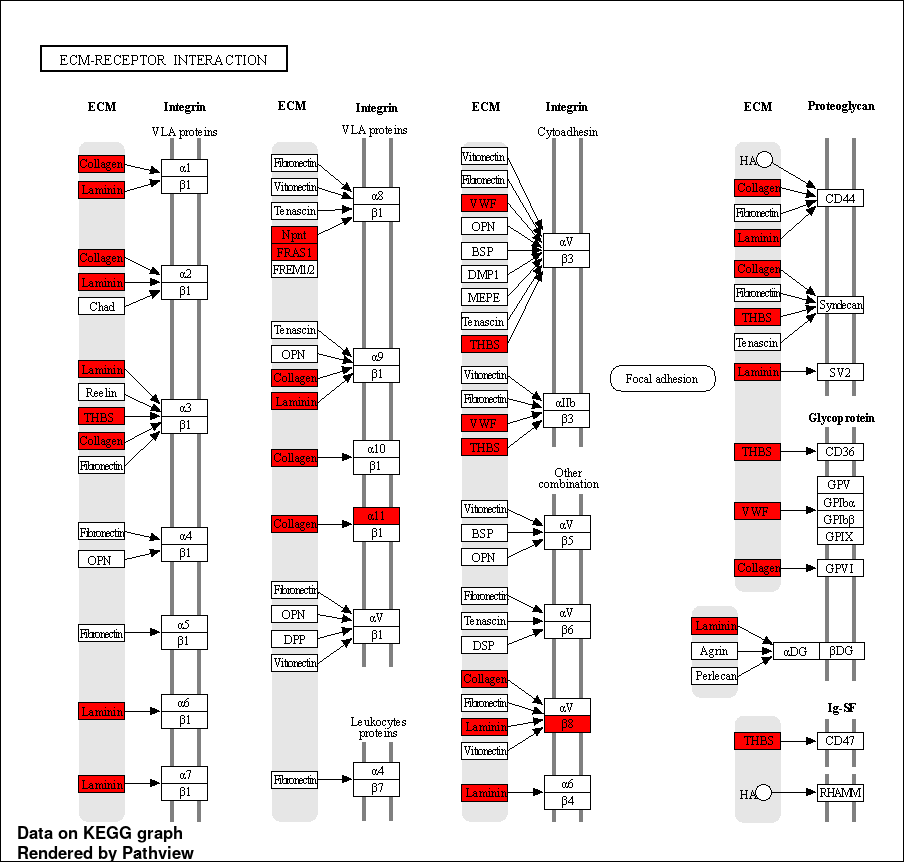


**Supplementary Figure 1**. ECM-receptor interaction pathway in response to 25 and 50 µM TQ treatment for 48 hours in A172 glioblastoma cells. DEGs from experimental dataset are highlighted in red.


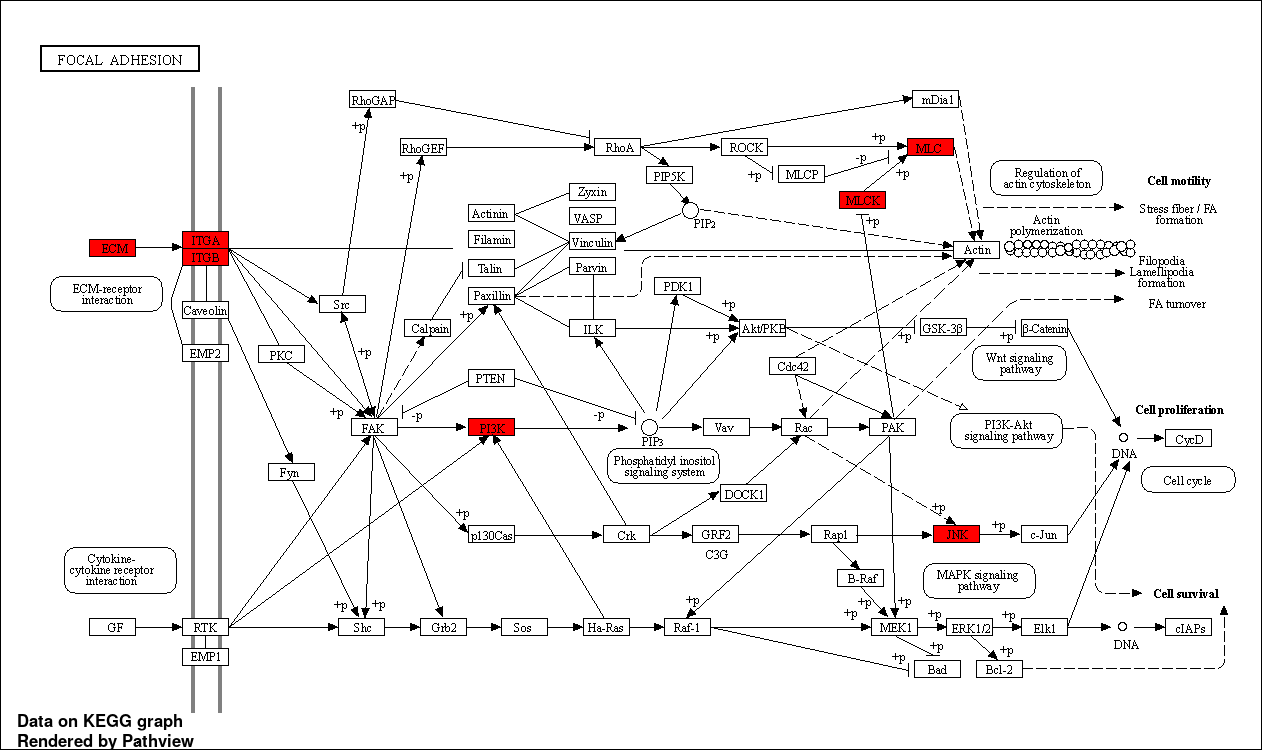


**Supplementary Figure 2.** Focal adhesion pathway in response to 25 and 50 µM TQ treatment for 48 hours in A172 glioblastoma cells. DEGs from experimental dataset are highlighted in red.


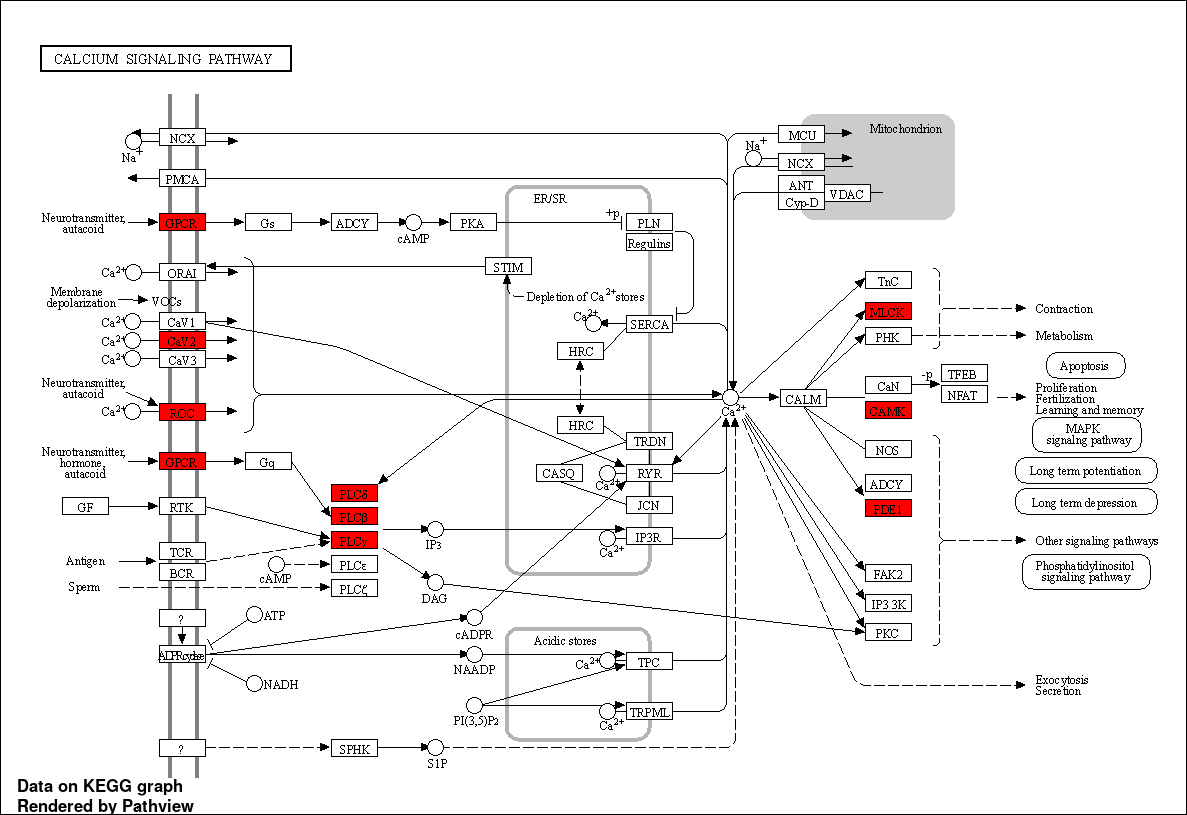


**Supplementary Figure 3.** Calcium signaling pathway in response to 25 and 50 µM TQ treatment for 48 hours in A172 glioblastoma cells. DEGs from experimental dataset are highlighted in red.


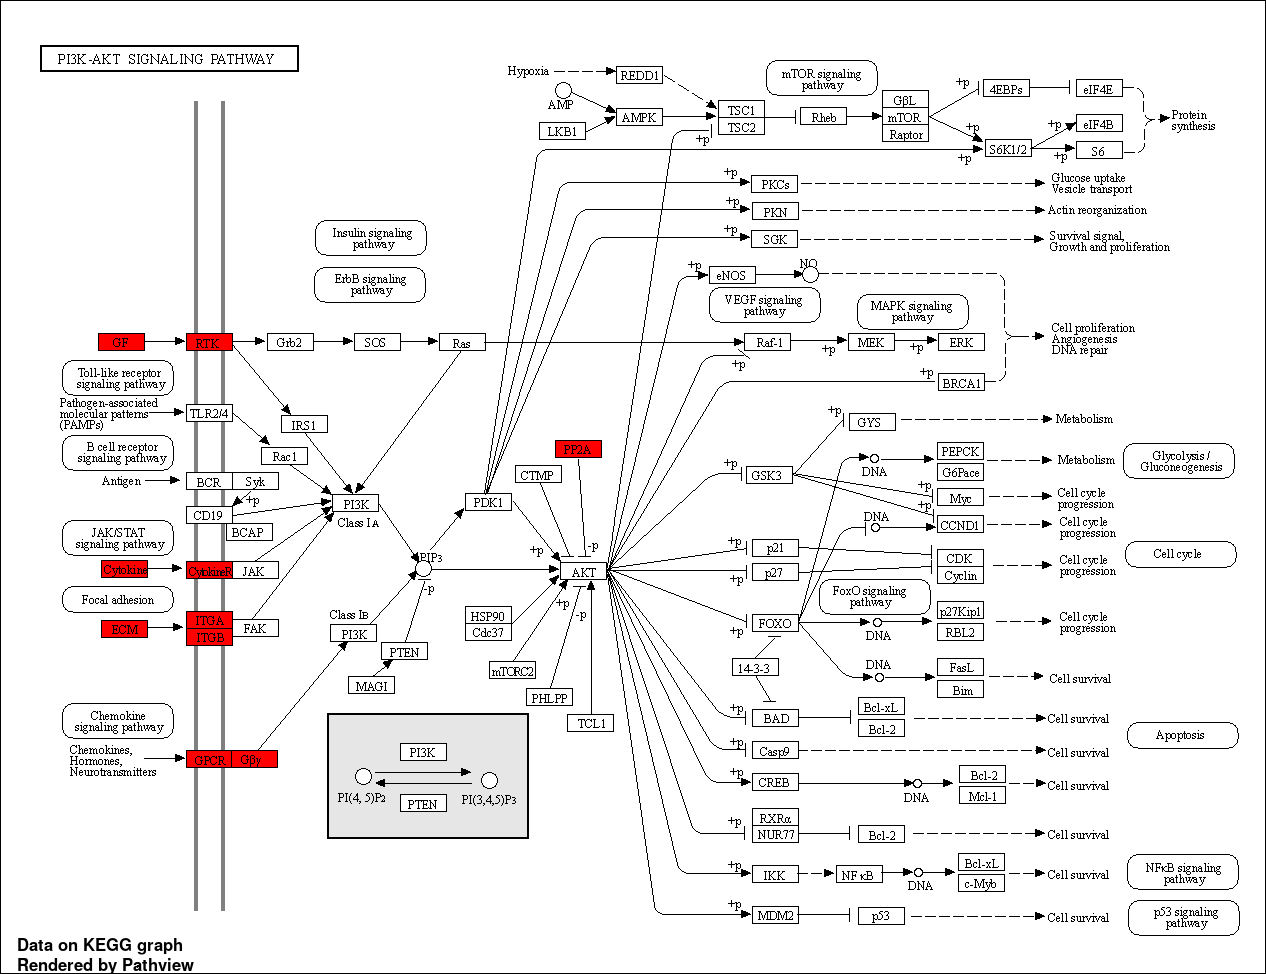


**Supplementary Figure 4.** PI3K-AKT signaling pathway in response to 50 µM TQ treatment for 48 hours in A172 glioblastoma cells. DEGs from experimental dataset are highlighted in red.


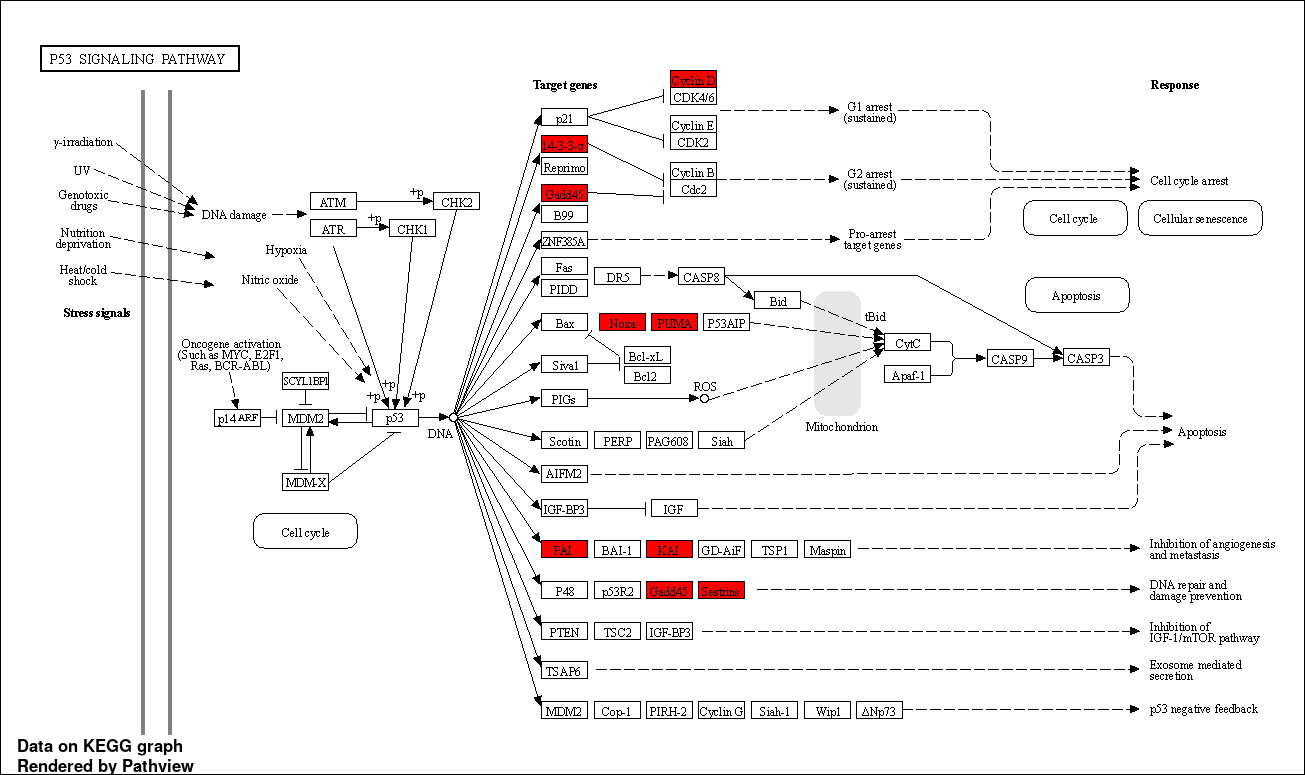


**Supplementary Figure 5**. P53 signaling pathway in response to 25 and 50 µM TQ treatment for 48 hours in A172 glioblastoma cells. DEGs from experimental dataset are highlighted in red.

**Supplementary Table 1.** Target genes and their respective primer sequences for qRT-PCR.

| **Target Gene Symbol** | **Primer Sequence (5' to 3')** | **References** |
| --- | --- | --- |
| 18S rRNA | Forward- AGAAACGGCTACCACATCCA  Reverse-CACCAGACTTGCCCTCCA | Harvard Primer Bank |
| WNT7B | Forward- CACAGAAACTTTCGCAAGTGG  Reverse- GTACTGGCACTCGTTGATGC | Harvard Primer Bank |
| CHAC1 | Forward- GAACCCTGGTTACCTGGGC  Reverse- CGCAGCAAGTATTCAAGGTTAT | Harvard Primer Bank |
| DUSP5 | Forward- TGTCGTCCTCACCTCGCTA  Reverse- GGGCTCTCTCACTCTCAATCTTC | Harvard Primer Bank |
| CD300A | Forward- CCCGAGAGGTCTTTTTCCGAG  Reverse- CCAGCCCATGATGGTTCTGAT | Harvard Primer Bank |
